# Supplementary material
Source: PubMed Central journal article supplement (PMC4529031)
Supplement: supp_dev.122358_DEV122358supp.pdf [file supp_dev.122358_DEV122358supp.pdf]

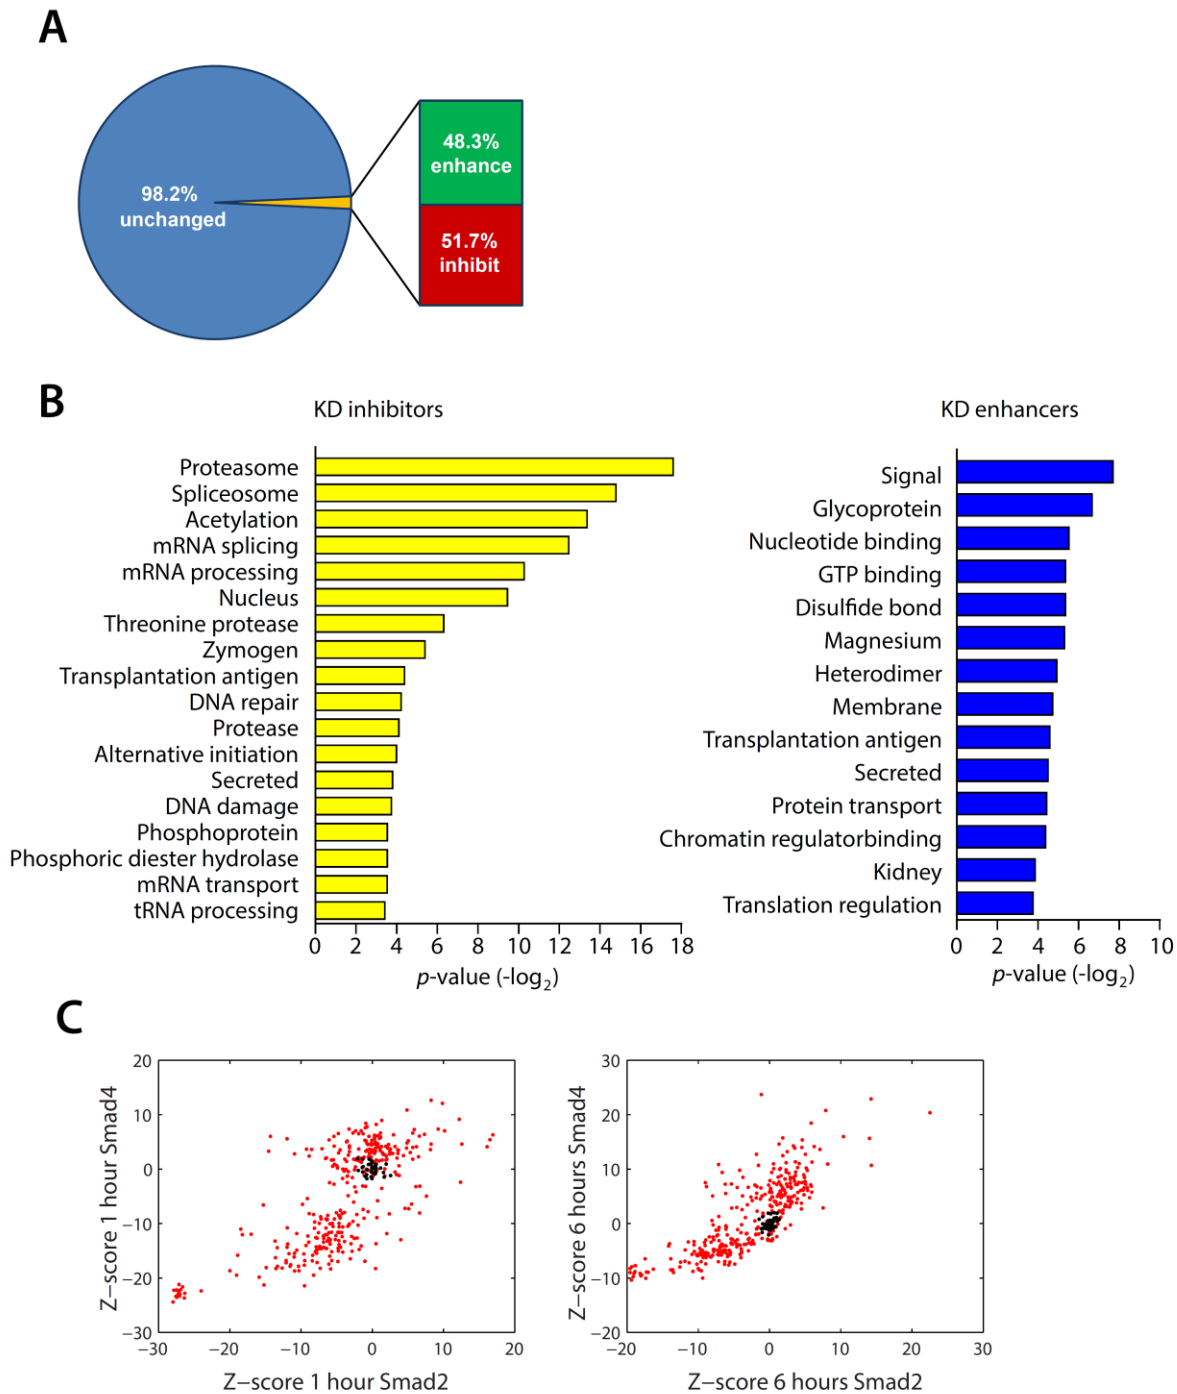

**Fig.S1. A genome-wide siRNA screen identifies modulators of TGFβ1 signaling.**

**A.** A siRNA screen identifies 321 genes (yellow, 1.8%) to affect TGFβ1-induced Smad4 nuclear translocation when knocked down. Knockdown of 48.3% of these genes (green) leads to an enhancement of Smad4 translocation, while knockdown of 51.7% of them (red) leads to an inhibition of

Smad4 translocation. The great majority of genes in the screen (98.2%, blue) does not change Smad4 behavior.

**B.** Gene ontology analysis of genes that when knocked down inhibit (yellow) or enhance (blue) Smad4 nuclear translocation.

**C.** Correlation of Smad4 and Smad2 nuclear translocation in response to 1 hour and 6 hours TGF $\beta$ 1 treatment when the genes identified in the siRNA screen were knocked down.

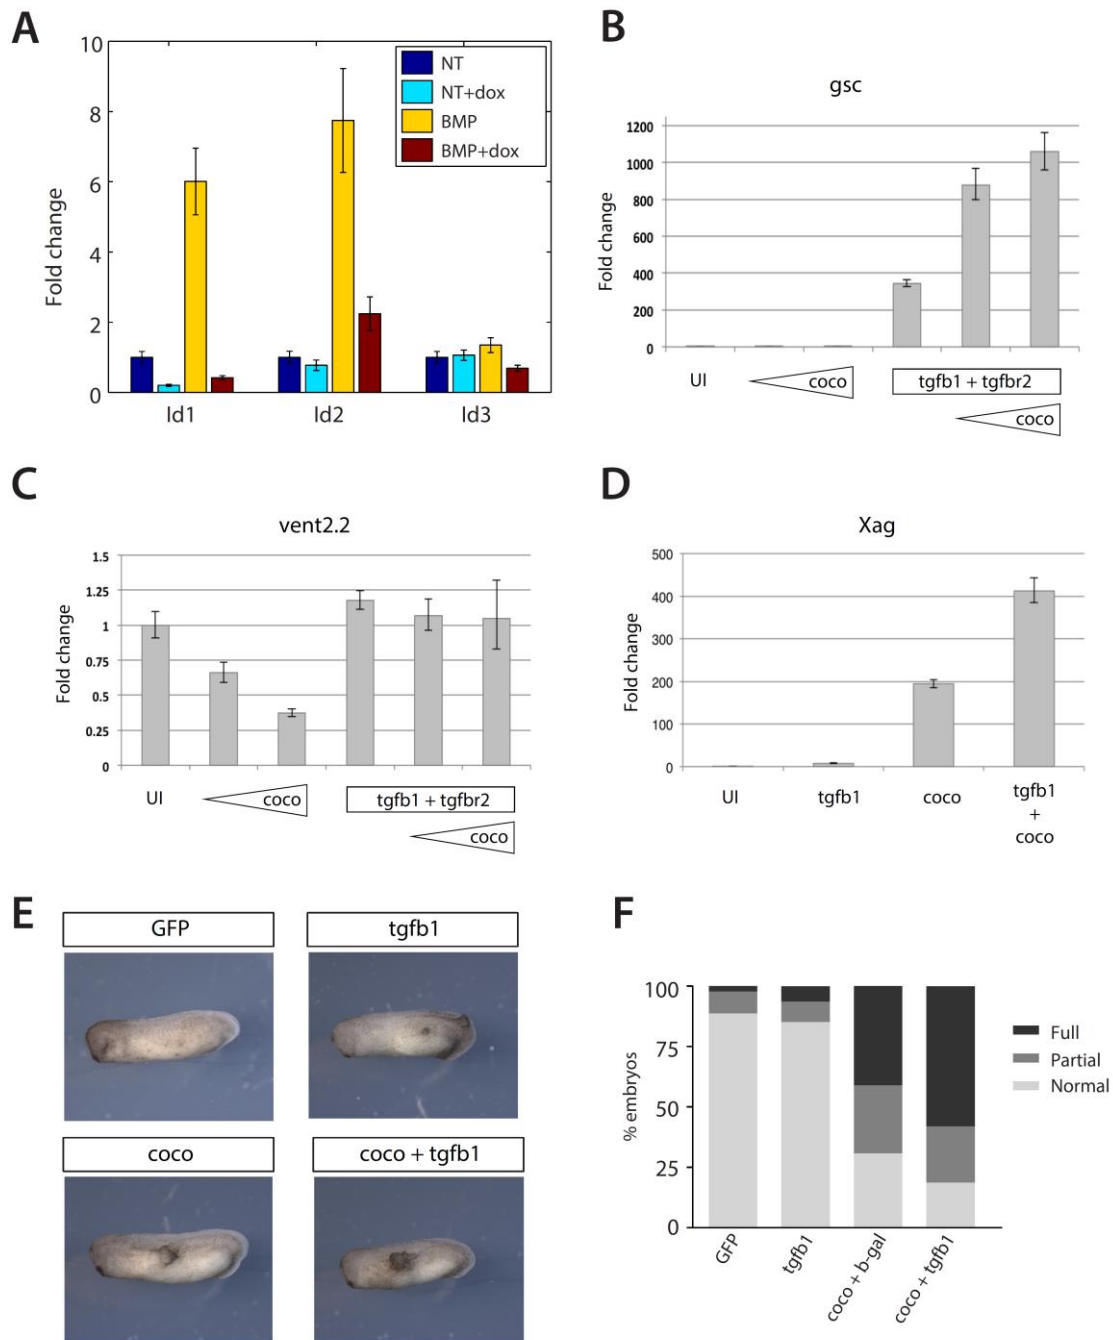

**Fig.S2. Coco modulates TGF $\beta$  signaling**

**A.** qRT-PCR quantification of the changes in expression levels of the BMP-responsive genes *ID1*, *ID2*, and *ID3* in RUES2 treated with vehicle (NT) or BMP4 (BMP) in the absence or presence (+dox) of doxocycline. Doxocycline treatment leads to the production of Coco.

**B.** Coco enhances expression of the Smad2-responsive gene *gsc* in animal cap explants injected with *tgfb1* and *tgfbr2* in a dose-dependent manner.

**C.** Expression of Coco in *Xenopus* animal caps leads to a dose-dependent decrease in the expression levels of the BMP-induced gene *vent2.2*. When animal caps are injected with *tgfb1* and *tgfbr2*, *vent2.2* levels are not affected.

**D.** Coco and TGF $\beta$ 1 synergize to induce the cement gland marker *Xag*

**E.** Coco and TGF $\beta$ 1 synergize to induce cement gland in *Xenopus* embryos. Embryos were injected with constructs encoding the indicated genes and the emergence of ectopic cement glands was observed.

**F.** Quantification for experiment in E. Embryos were scored based on the presence of ectopic cement glands and given a score of “normal” if no ectopic cement glands were observed, “partial” if ectopic extrusions were observed in the embryo, and “full” if ectopic, fully formed cement glands were observed.

N>40 per condition

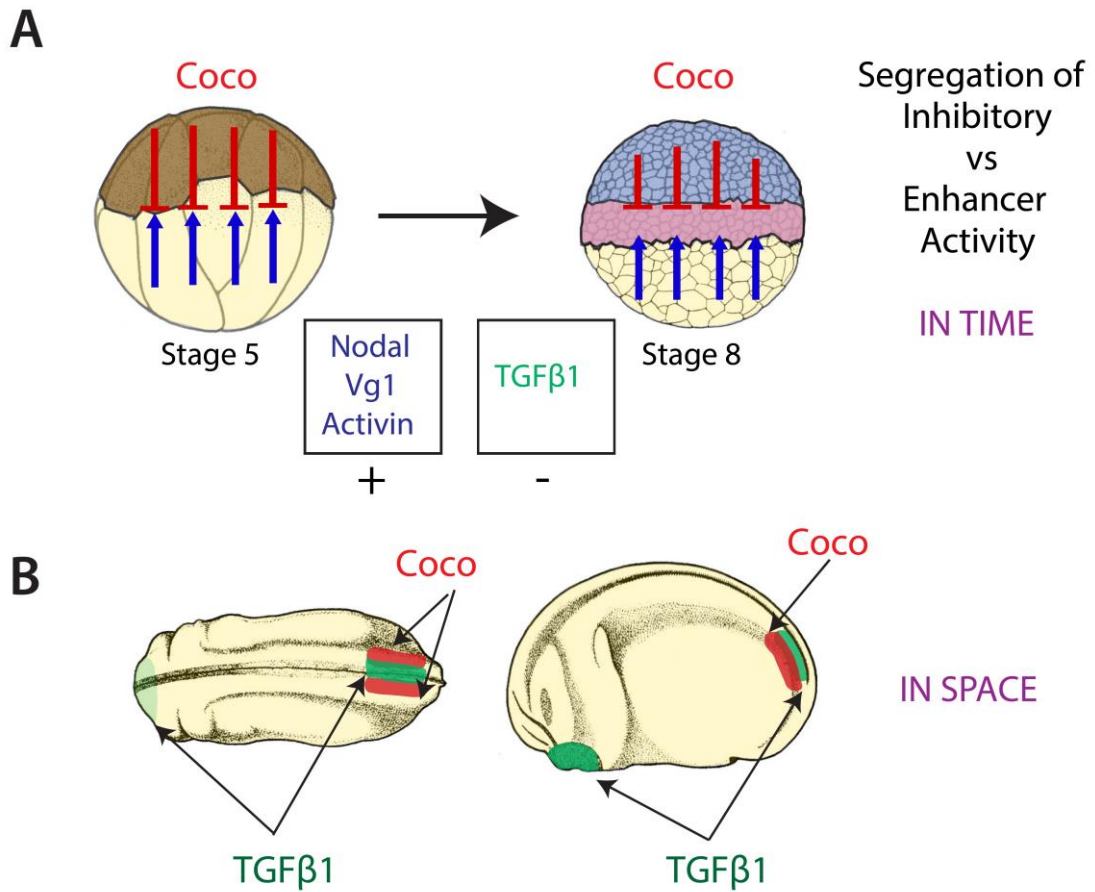

**Fig.S3. Model of Coco activity during early embryo development**

**A-B.** Model for the segregation of inhibitory and enhancer activities of Coco

(A) in time and (B) in space.

**Table S1**

List of genes that affect Smad4 nuclear translocation at 1 hour or 6 hours after application of TGF $\beta$ 1 as identified in the siRNA screen.

| Gene name     | siRNA  | Smad4 1h - trial1 | Smad4 1h - trial2 | Smad4 6h - trial1 | Smad4 6h - trial2 | Smad2 - 1h   | Smad2 - 6h |
|---------------|--------|-------------------|-------------------|-------------------|-------------------|--------------|------------|
| 0610030I09Rik | 75400  | 1.664             | 2.1385            | 2.0195            | 2.0844            | 1.026612774  | 0.23208093 |
| 1110001A23Rik | 68472  | -4.0538           | -5.5601           | -3.0741           | -4.0956           | -3.80939617  | -2.8845832 |
| 1110004B15Rik | 74165  | 2.1254            | 2.1372            | 2.4198            | 2.0521            | -1.055870247 | -1.784663  |
| 1110012M11Rik | 73711  | -4.4023           | -3.9954           | -3.6414           | -3.287            | -4.116401895 | -2.7311913 |
| 1110018G07Rik | 68497  | -3.6142           | -3.7287           | -2.9521           | -2.2546           | -2.828468812 | -1.2052422 |
| 1300007B12Rik | 57439  | 1.9214            | 1.2244            | 2.2817            | 2.4787            | 0.933861984  | 0.28780813 |
| 1700016D06Rik | 76413  | 1.7408            | 1.2759            | 2.6434            | 1.9359            | -0.915484618 | -0.5744852 |
| 1810009M01Rik | 65963  | -4.3446           | -3.9764           | -2.4946           | -2.869            | -3.104351661 | -1.5113031 |
| 2010003K11Rik | 69861  | 1.9857            | 1.5716            | 2.999             | 2.5732            | 0.95847377   | 0.39288047 |
| 2210415F13Rik | 70163  | -3.4281           | -3.7383           | -1.7487           | -2.0166           | -2.019776433 | -0.9077318 |
| 2300003C06Rik | 71912  | 1.682             | 1.5323            | 2.5602            | 1.9648            | 0.115555732  | -0.137986  |
| 2310056K19Rik | 75689  | 0.74815           | 0.87339           | 2.1244            | 2.0244            | 1.645071321  | -0.203623  |
| 2400006A19Rik | 66413  | 2.1427            | 3.1321            | 3.0424            | 3.5059            | 2.547159488  | 3.91705751 |
| 2400009B11Rik | 66985  | 1.8991            | 1.6324            | 2.4511            | 2.5595            | 0.699123252  | 0.39851497 |
| 2510048O06Rik | 66537  | 1.2071            | 1.2909            | 2.9229            | 3.8901            | 3.711456536  | 3.82603435 |
| 2810032G03Rik | 72669  | 2.0565            | 1.9268            | 2.4338            | 2.1488            | 0.820389767  | -0.0178512 |
| 2810406C15Rik | 68298  | -4.1397           | -3.0314           | -2.1263           | -1.4581           | -2.042188435 | -1.8786331 |
| 2900027G03Rik | 72865  | -3.5174           | -3.7285           | -2.2043           | -2.7047           | -3.194434194 | -1.6214416 |
| 2900073H19Rik | 68205  | 2.3656            | 2.4836            | 2.0778            | 2.3612            | 1.021697206  | 0.0962536  |
| 2900090M10Rik | 329977 | -3.5385           | -2.8673           | -1.7268           | -2.7171           | -1.16726489  | -0.5284162 |
| 3632451O06Rik | 67419  | -3.2644           | -3.3845           | -2.1919           | -2.8973           | -1.717428275 | -1.2089862 |
| 4921511C20Rik | 245598 | -3.9738           | -3.899            | -2.4402           | -2.9279           | -3.354434568 | -1.4034444 |
| 4930412M03Rik | 320201 | 1.1335            | 0.88291           | 2.1742            | 2.452             | 0.582242728  | 0.62189949 |
| 4930429A08Rik | 74648  | 1.0692            | 1.1471            | 2.1345            | 2.7026            | 0.768640516  | 1.01031561 |
| 4930449I24Rik | 67410  | -3.6372           | -3.6273           | -2.8825           | -2.2769           | -4.508825796 | -2.6030435 |
| 4930529M08Rik | 78774  | 1.3171            | 1.5153            | 2.6845            | 1.4015            | 0.172064393  | 0.05820836 |
| 4930534B04Rik | 75216  | 1.5968            | 1.6715            | 2.7829            | 2.2456            | 0.045780469  | -0.0570765 |
| 4933421H10Rik | 68178  | -3.9326           | -3.7393           | -1.2865           | -1.571            | -2.965833132 | -2.9514312 |
| 5530600A18Rik | 71452  | 1.6941            | 1.5973            | 3.0773            | 2.5962            | -2.291490554 | -1.4131133 |
| 5530600A18Rik | 77582  | 0.7408            | 0.40804           | 2.2073            | 2.5653            | 0.834274209  | 1.44564266 |
| 5530600A18Rik | 432450 | -3.5852           | -4.1159           | -4.0744           | -2.5189           | -1.4274573   | -0.9923853 |
| 5730589L02Rik | 74552  | -3.9977           | -2.7313           | -2.0469           | -2.4623           | -2.534804372 | -3.1585053 |
| 9930117H01Rik | 320782 | 2.8625            | 2.4885            | 3.326             | 2.8708            | -1.175880712 | -0.0761918 |
| A2lp          | 233871 | 2.5482            | 2.0897            | 2.3547            | 2.0764            | 0.475417391  | -0.0493538 |
| A630007B06Rik | 213993 | -3.1695           | -3.3922           | -2.006            | -2.6316           | -1.218077196 | -0.7353482 |
| A930006D11    | 278304 | 1.2226            | 1.2096            | 2.3801            | 2.1688            | 0.631534195  | 0.06562835 |
| A930008A22Rik | 235283 | 1.8486            | 1.8931            | 2.1482            | 2.2232            | 0.696319206  | 0.41963818 |
| A930013B10Rik | 414094 | 1.3309            | 2.0182            | 2.8371            | 2.4594            | 2.008232656  | 0.99257187 |
| AA407526      | 231279 | -3.8253           | -3.489            | -1.0107           | -1.7075           | 0.231091944  | 0.3233265  |
| AB041803      | 232685 | 2.0183            | 1.5037            | 2.1422            | 2.4683            | -0.467421106 | 0.25875832 |
| Accn4         | 241118 | -3.8334           | -2.7027           | -1.7686           | -1.2842           | -3.156657648 | -2.5098703 |
| Acp5          | 11433  | 0.77669           | 1.0269            | 2.1484            | 2.0113            | -0.602375169 | 1.32192457 |
| Actg          | 11465  | 0.82704           | 1.1729            | 2.1797            | 2.1111            | 1.691864267  | 1.25875884 |
| Actr3         | 74117  | -4.2777           | -2.4767           | -3.4422           | -3.0043           | 0.16846598   | 0.45437191 |
| Adam21        | 56622  | -3.5149           | -3.134            | -2.3048           | -3.1901           | -1.201965811 | 0.27272101 |
| Agtrap        | 11610  | -4.4631           | -3.8006           | -2.4087           | -2.4567           | -3.979893047 | -2.329628  |
| Ahsg          | 11625  | -3.4473           | -3.4417           | -2.0295           | -1.2521           | -1.139916952 | -1.2690443 |
| A1118078      | 244886 | -4.0926           | -4.0332           | -3.0788           | -3.2749           | -2.681490618 | -1.6489345 |
| A1507495      | 105866 | 1.2629            | 1.8684            | 2.688             | 2.2151            | 1.293662538  | 0.22189311 |
| A1847670      | 330050 | 1.3456            | 1.2829            | 2.0639            | 2.1159            | 0.545640758  | 0.0492191  |
| AK122209      | 382038 | -4.8392           | -3.8581           | -2.3746           | -1.9541           | -3.300152849 | -1.532173  |
| Apba2         | 11784  | -3.1533           | -3.2089           | -2.0242           | -2.2422           | -1.183206538 | -0.7833774 |
| Apg7l         | 74244  | 1.7753            | 1.6365            | 2.0908            | 2.2373            | 0.571624015  | 0.18238364 |
| Arch          | 67106  | -3.2581           | -3.1196           | -2.8231           | -3.4799           | -1.088215226 | -0.9041176 |
| Arhgap10      | 78514  | -3.3146           | -3.0201           | -2.9258           | -2.2983           | -1.54052215  | -0.8223803 |
| Asrij         | 68095  | 1.7169            | 2.9291            | 2.0695            | 2.1259            | 0.904035894  | -0.0654788 |
| Atp4a         | 11944  | 1.2568            | 1.1761            | 2.3833            | 2.458             | -0.417179114 | -1.4519741 |
| Atp6v0a1      | 11975  | 0.96987           | 0.60082           | 2.1658            | 2.1476            | 1.510898046  | 1.54548208 |
| AW742319      | 57874  | 2.8576            | 1.3132            | 3.4732            | 1.8784            | -0.821708619 | -2.326366  |
| B230354K17Rik | 320063 | -2.4488           | -3.5461           | -1.6169           | -2.1246           | -0.169010834 | -0.9123717 |
| BC005752      | 233189 | 1.9745            | 2.0317            | 2.3262            | 2.6102            | 1.808133741  | 3.01831739 |
| BC011210      | 70461  | 1.8045            | 1.8767            | 2.5234            | 2.4521            | 0.999903045  | 0.596328   |
| BC016235      | 216019 | -4.1057           | -4.1918           | -2.5586           | -2.062            | -3.734508444 | -2.0288371 |
| BC024561      | 232983 | 0.68459           | 1.4334            | 2.1088            | 2.1843            | 0.685279547  | 0.15374776 |
| BC034054      | 217125 | -4.4652           | -3.8043           | -2.0132           | -1.3508           | -1.672556745 | -1.4689641 |
| BC048082      | 332110 | -4.3555           | -4.6338           | -3.6749           | -3.5804           | -2.073895205 | -1.6075469 |
| BC050092      | 235048 | -3.0264           | -3.9104           | -2.2492           | -1.2765           | -0.949364015 | -1.0961849 |
| BC057627      | 330474 | -3.3855           | -3.1081           | -1.7417           | -2.0908           | -0.730539773 | -0.869699  |

|               |        |           |          |          |          |              |            |
|---------------|--------|-----------|----------|----------|----------|--------------|------------|
| BC066223      | 407786 | -3.3786   | -4.6417  | -2.8388  | -1.9606  | -3.070642    | -1.1440967 |
| Brd4          | 57261  | 2.6571    | 2.5183   | 3.9225   | 4.6362   | 4.851067113  | 4.00914331 |
| Brsk2         | 75770  | -3.6334   | -3.2506  | -0.38198 | -0.36405 | -2.028989728 | -2.5610504 |
| Btbd12        | 52864  | 1.3642    | 1.3577   | 2.4559   | 2.2269   | 0.117558622  | -1.0616056 |
| Btf3          | 218490 | 2.305     | 2.0732   | 2.8354   | 2.4081   | -0.464678165 | 1.14701406 |
| C130099A20Rik | 235534 | 1.6293    | 2.0626   | 2.9123   | 2.8995   | 0.023157994  | 1.3712141  |
| C1qb          | 12260  | 0.61111   | 0.91771  | 2.5444   | 2.4915   | 1.472055555  | -0.785237  |
| C230004F18Rik | 331424 | 2.0132    | 1.6837   | 2.5131   | 1.7966   | 0.265534866  | 0.71999049 |
| C330027G06Rik | 652994 | 1.2535    | 1.2937   | 3.5831   | 1.1235   | 0.514083356  | -0.1093563 |
| C630007C17Rik | 241514 | 1.7346    | 1.2606   | 2.9438   | 1.5182   | 1.587965187  | 0.13176579 |
| C730027E14Rik | 216871 | -3.9352   | -4.3338  | -2.9888  | -3.2754  | -2.451613139 | -0.9252655 |
| Cacnb3        | 12297  | 1.9748    | 2.1755   | 2.6743   | 1.9364   | 1.397636302  | 1.88470751 |
| Cd19          | 12478  | -3.9174   | -3.7164  | -2.5497  | -3.5353  | -1.683046458 | -1.2367077 |
| Cd207         | 246278 | -3.5213   | -3.1191  | -1.8436  | -2.5576  | -2.120036364 | -1.282383  |
| Cdk3          | 69681  | -4.0409   | -4.0076  | -3.4624  | -4.8825  | -2.46413969  | -0.9456844 |
| Cdyl2         | 75796  | 1.2018    | 0.99463  | 2.3859   | 2.4014   | 0.958663875  | 0.05156681 |
| Chd3          | 216848 | 1.6735    | 1.5247   | 2.9968   | 3.2713   | 1.015851482  | 2.47171511 |
| Chd9          | 109151 | -3.5637   | -2.9728  | -2.8161  | -3.4354  | -0.740241909 | 0.02513655 |
| Cicn4-2       | 12727  | -4.89     | -4.5971  | -3.7897  | -3.8565  | -4.020819901 | -3.4653138 |
| Cldn15        | 60363  | -9.9629   | -0.1886  | 0.67826  | 0.044912 | 0.095289199  | 0.02041024 |
| Clecsf9       | 56619  | -3.8497   | -4.03    | -2.7959  | -1.8695  | -4.622467749 | -4.3935115 |
| Clns1a        | 12729  | -0.27718  | 0.39345  | 3.3154   | -0.53586 | 0.750213926  | 1.07192444 |
| Col1a1        | 12842  | -3.232    | -3.6625  | -2.4746  | -2.6161  | -1.013490448 | -1.4829885 |
| Col4a3        | 12828  | -3.5292   | -4.2191  | -2.3418  | -2.1092  | -1.183715747 | -0.5757225 |
| Copa          | 12847  | -3.9262   | -4.4704  | -2.2548  | -1.9629  | -2.656668359 | -3.9997574 |
| Copb1         | 70349  | -5.6244   | -5.0193  | -2.0148  | -2.138   | -2.701485573 | -3.3268793 |
| Copb2         | 50797  | -4.8246   | -4.6046  | -2.9873  | -1.9178  | -3.182790273 | -4.0499894 |
| Copg          | 54161  | -3.5074   | -2.7638  | -3.2044  | -2.6018  | -1.644618124 | -2.5476499 |
| Cox8a         | 12868  | 1.4568    | 0.71121  | 2.2226   | 2.0778   | 1.869333918  | 1.67201124 |
| Cpsf4         | 54188  | -4.6113   | -3.6211  | -2.2341  | -2.7888  | -2.606623262 | -1.961013  |
| Crygd         | 12967  | 1.6796    | 1.7767   | 2.8338   | 1.0357   | 0.663451438  | 0.26052528 |
| Ctnnb1        | 12387  | 0.67612   | -0.66977 | 2.7657   | 1.804    | -3.150798345 | -3.1026607 |
| Cul3          | 26554  | 2.0184    | 2.4861   | 2.6237   | 2.5967   | 0.57958126   | -1.0701562 |
| D430014M15    | 269902 | -3.3369   | -3.3644  | -1.4829  | -2.6491  | -2.375326785 | -1.0107098 |
| D530030D03Rik | 98417  | -4.8782   | -5.2332  | -3.7892  | -4.0114  | -2.815562052 | -1.1752595 |
| D5Erttd577e   | 320549 | 1.4254    | 1.3399   | 3.2879   | 1.6305   | -2.579309271 | -2.5692365 |
| D8Erttd325e   | 66855  | 0.91618   | 1.1274   | 2.3715   | 2.0733   | 1.892098972  | 1.30391517 |
| Dctd          | 320685 | 0.90999   | 1.6147   | 2.6063   | 2.9114   | 0.677912985  | 0.48130261 |
| Dcx           | 13193  | 1.3468    | 2.0784   | 2.4746   | 2.8902   | 0.471180769  | 0.22497602 |
| Dfna5h        | 54722  | -4.895    | -4.6578  | -3.6425  | -3.1717  | -3.342899279 | -1.7621744 |
| Dnahc8        | 13417  | -4.5377   | -5.1413  | -1.7543  | -2.9147  | -1.198211241 | -1.0744439 |
| Dner          | 227325 | 0.74793   | 0.68891  | 2.1805   | 2.6246   | 0.735087013  | -0.969631  |
| Dpp4          | 13482  | 1.2974    | 1.8177   | 2.3425   | 2.7868   | 0.437973528  | 0.70156715 |
| Dte           | 23863  | -4.0276   | -3.1736  | -1.5109  | -1.7942  | -1.774357883 | -1.6854352 |
| Dufd1         | 71804  | -3.7126   | -3.483   | -1.8073  | -2.7996  | -1.99562633  | -1.3534012 |
| Dullard       | 67181  | 1.2656    | 1.4943   | 3.3954   | 3.6075   | 3.24639901   | 0.9706455  |
| E030041M21Rik | 75089  | 2.4128    | 2.2345   | 2.11     | 2.3123   | 0.006876873  | -1.2280335 |
| E330040A16Rik | 330660 | -4.1696   | -3.7484  | -2.1179  | -2.2564  | -1.752237828 | -1.4002936 |
| E430028B21Rik | 211948 | -4.4924   | -4.3927  | -2.2186  | -3.3399  | -3.278270425 | -2.9363935 |
| Ecg2          | 408198 | 0.0027139 | -6.0515  | 0.14739  | 1.9023   | -2.029111938 | -1.8620571 |
| Eif2s1        | 13665  | -3.7325   | -3.7761  | -2.6397  | -2.4464  | -2.306984098 | -0.5885917 |
| Emd           | 13726  | -3.8433   | -3.6866  | -2.7001  | -2.8948  | 0.011873914  | -0.0938861 |
| Enpp5         | 83965  | 2.4636    | 1.6954   | 3.0787   | 2.7643   | 0.340958958  | 0.28375524 |
| Epx           | 13861  | -3.3697   | -3.6998  | -2.9606  | -2.8217  | -1.675191055 | -2.0222264 |
| Ern2          | 26918  | 0.92642   | 1.2601   | 2.7593   | 1.8509   | 0.135781528  | 0.18635621 |
| Esx1          | 13984  | -3.6266   | -2.5375  | -2.3902  | -1.9753  | -2.495887197 | -0.8967532 |
| Exosc3        | 66362  | -3.4206   | -3.1542  | -2.4516  | -2.2672  | -4.862339311 | -3.2393283 |
| Faim2         | 72393  | -1.4342   | -3.731   | -0.50773 | -0.83627 | -0.035475768 | -0.1325986 |
| Fgf21         | 56636  | 1.2565    | 0.74757  | 2.0283   | 2.0031   | 0.294532642  | -0.6094492 |
| Fgf3          | 14174  | 2.2144    | 2.0974   | 2.5115   | 2.6835   | 0.652425358  | 0.28170409 |
| Frmf3         | 242506 | -4.0374   | -3.996   | -2.0302  | -2.8907  | 0.194585026  | 0.1123663  |
| G0s2          | 14373  | 1.1221    | 0.60656  | 2.34     | 2.0588   | -0.14963372  | -0.6095913 |
| Gbp2          | 14469  | 1.985     | 2.0677   | 2.6688   | 2.5181   | 1.090128156  | 0.40532951 |
| Gcet2         | 14525  | -4.2405   | -3.936   | -1.6875  | -2.5176  | -0.385200766 | -0.3628409 |
| Ghsr          | 208188 | 2.3494    | 2.742    | 3.2586   | 4.1687   | 1.109776849  | 0.45906733 |
| Gm14          | 195046 | -3.6907   | -4.2075  | -2.3478  | -2.53    | 1.331785346  | 1.01627756 |
| Gm185         | 235497 | 1.3417    | 1.1401   | 3.9929   | 1.2115   | -0.149063406 | 0.31445463 |
| Gm867         | 333670 | -3.9656   | -4.1497  | -1.3853  | -2.5028  | -0.775248356 | -1.920169  |
| Gmppa         | 69080  | 0.91705   | 1.0295   | 3.3294   | 0.45913  | 0.340354696  | -0.5728311 |
| Gnat1         | 14685  | -3.6161   | -2.8099  | -1.8677  | 0.041448 | -0.477951556 | -0.0742333 |
| Grin1a        | 28015  | -3.4865   | -3.2196  | -2.3063  | -0.91011 | -2.187252001 | -0.300225  |
| Gsn           | 227753 | -3.2066   | -3.5012  | -2.6866  | -1.9239  | -1.838810211 | -1.3296337 |
| H2-Q6         | 110557 | 2.3804    | 2.222    | 3.1616   | 3.634    | 1.329633088  | 1.66606783 |
| H2-T24        | 15042  | 1.2397    | 1.5808   | 2.394    | 2.081    | 1.217505184  | -0.0185308 |
| H2-Tw3        | 547339 | -3.4448   | -3.5982  | -2.5219  | -2.345   | -2.255832319 | -1.7213613 |
| H2afy2        | 67552  | -4.8256   | -4.6595  | -2.8043  | -3.1132  | -3.092639845 | -1.2354844 |
| Hapl1         | 12950  | -0.13856  | 0.71139  | 2.283    | 2.4507   | 1.652505778  | 0.70434733 |
| Hdac7a        | 56233  | -3.0534   | -3.2186  | -1.589   | -3.0998  | -0.27648117  | -0.437356  |
| Hddc2         | 69692  | -3.6826   | -2.2849  | -0.11309 | -0.74505 | -0.101102672 | -0.403759  |
| Hnrpab        | 15384  | -3.199    | -3.027   | -2.3514  | -2.7298  | -1.242308772 | -0.6244375 |
| Hp            | 15439  | -4.0972   | -4.1657  | -1.9048  | -2.9111  | -2.940712137 | -2.3234869 |



|           |        |           |          |          |          |              |            |
|-----------|--------|-----------|----------|----------|----------|--------------|------------|
| Hspa14    | 50497  | -3.13     | -3.0315  | -3.6821  | -3.4545  | -2.732452293 | -1.1991443 |
| Hspa8     | 15481  | -1.2952   | -1.5636  | 2.821    | 1.6732   | 0.31975548   | -0.1899136 |
| Hspg2     | 15530  | 2.2702    | 2.3927   | 2.4529   | 2.0516   | 0.192113664  | -0.9309    |
| Hyal3     | 109685 | -4.7214   | -0.75392 | -1.6954  | -0.65599 | 0.031244238  | -0.0589361 |
| Ifna12    | 242519 | -4.2366   | -3.5138  | -2.5412  | -2.3353  | -2.3663647   | -1.5627612 |
| Ik        | 24010  | 1.8216    | 1.4787   | 2.0755   | 2.0042   | -1.093965898 | -0.6517265 |
| Il27      | 246779 | -3.2404   | -3.1111  | -2.6308  | -2.7879  | 0.275739422  | -0.9561935 |
| Itgad     | 381924 | -5.3181   | -5.3209  | -2.5634  | -2.8129  | -3.223914022 | -0.5071941 |
| Ixl       | 67224  | -4.1633   | -4.5526  | -2.8399  | -3.4751  | 0.88465199   | -0.4151207 |
| Kcnc4     | 99738  | 2.5668    | 2.0096   | 2.4368   | 2.7192   | 1.734094698  | 0.83521976 |
| Kcnk15    | 241769 | 2.0778    | 1.6369   | 2.2626   | 3.5385   | 1.208244363  | 0.5944313  |
| Kcnmb2    | 72413  | -4.3828   | -4.8846  | -2.9586  | -2.7484  | -3.285888197 | -2.0025922 |
| Kif5a     | 16572  | 0.81579   | 0.39417  | 2.6241   | 1.9576   | -3.870637083 | -2.5956976 |
| Klkb1     | 16621  | 1.1884    | 1.4207   | 2.0409   | 2.1238   | 1.065204055  | 1.20127086 |
| Krtcap3   | 69815  | -3.4315   | -4.1288  | -1.6607  | -2.3414  | 1.407800121  | 0.8112237  |
| L1cam     | 16728  | -3.3247   | -3.7529  | -0.95586 | -1.6737  | -2.587633147 | -1.1365099 |
| Lgi1      | 56839  | 0.96119   | 1.0701   | 2.912    | 2.6937   | 1.213309298  | 0.55557671 |
| Lmo1      | 109594 | 1.8783    | 1.9154   | 2.9317   | 1.0813   | 1.28272472   | -0.1994898 |
| LOC434448 | 434448 | -0.27118  | -0.22462 | 5.208    | -0.987   | 0.24204334   | -1.05607   |
| LOC547347 | 547347 | -3.6262   | -3.7794  | -2.674   | -2.0881  | -2.444552102 | -1.525167  |
| Lrrc15    | 74488  | -4.2493   | -4.1573  | -2.6247  | -2.6077  | -2.972072645 | -1.6662643 |
| Ltbp2     | 16997  | 1.2823    | 1.9614   | 2.2252   | 2.1679   | 0.747613564  | 0.448515   |
| Magea7    | 17143  | -3.4996   | -4.2711  | -2.9371  | -2.7901  | -1.318364284 | -1.0600735 |
| Mdm2      | 17246  | 2.3058    | 2.1634   | 3.1038   | 2.3548   | -0.543008145 | 0.14908324 |
| Mical3    | 194401 | 1.2342    | 1.1919   | 2.6614   | 2.1708   | 1.095899196  | 0.58357623 |
| Mknk2     | 17347  | -3.4287   | -3.4168  | -1.9674  | -1.373   | -2.026606628 | -2.9247105 |
| Mlycd     | 56690  | 1.7261    | 1.539    | 2.0727   | 2.0791   | -0.213373155 | -0.6670361 |
| Mmp14     | 17387  | 0.52535   | 0.54504  | 2.3062   | 3.0581   | 1.405783652  | 0.14317689 |
| Mmp1b     | 83996  | 0.82865   | 0.70032  | 2.8045   | 2.0046   | 0.89028724   | 0.6451171  |
| Mrpl4     | 66163  | -3.5136   | -4.7314  | -1.565   | -2.3892  | -2.913615409 | -2.3462103 |
| Mrplf4    | 107849 | -4.1236   | -3.495   | -2.3042  | -2.1975  | -1.521416614 | -1.637579  |
| Ms4a4d    | 66607  | 2.6711    | 2.5076   | 3.1145   | 2.5597   | 1.737292533  | 0.40553339 |
| Mtnr1a    | 17773  | -0.094032 | -0.81067 | 2.0933   | 2.3291   | 0.453596071  | -0.1472038 |
| Mum1      | 68114  | 1.6838    | 2.1351   | 3.1247   | 1.7194   | -0.858955588 | -1.9468773 |
| Mup5      | 17844  | 1.562     | 1.6215   | 2.5979   | 2.5569   | 1.176204909  | 0.22616223 |
| Myst1     | 67773  | -3.6709   | -3.3411  | -2.7412  | -2.9203  | -3.072909679 | -1.6215404 |
| Naca      | 17938  | 2.4349    | 3.0195   | 4.8456   | 5.1971   | -0.782003867 | 0.53592392 |
| Nanos3    | 244551 | -4.0489   | -4.9706  | -3.1256  | -3.4742  | -2.286147251 | -1.2283301 |
| Ndrq2     | 29811  | 1.9739    | 1.6072   | 2.5721   | 2.8598   | 1.874887695  | 0.40423597 |
| Nfkbie    | 18037  | -3.2785   | -3.6645  | -2.2882  | -1.737   | -4.298053852 | -2.4504424 |
| Nkx1-2    | 20231  | -4.1358   | -3.8101  | -3.0269  | -2.501   | -2.74188964  | -1.6975568 |
| Nphp4     | 260305 | 0.99167   | 1.4379   | 2.2739   | 2.0498   | 0.904293893  | 0.9761132  |
| Nqo2      | 18105  | 1.6125    | 2.1551   | 2.0257   | 2.0069   | 0.644237271  | -0.2840135 |
| Nucb2     | 53322  | -0.89456  | -4.1663  | -1.0163  | -1.6029  | -1.228790961 | -0.7336925 |
| Nudt3     | 56409  | -2.9129   | -3.6178  | -1.9315  | -2.3655  | -2.635254407 | -1.3044885 |
| Nutf2     | 68051  | 0.32109   | 0.932    | 2.0847   | 2.2382   | -0.331638729 | -1.0851445 |
| Nxf       | 225872 | -3.3048   | -3.0557  | -2.0802  | -2.0284  | -1.545872243 | -1.2412733 |
| Olf101    | 258831 | -3.6138   | -2.6229  | -1.9659  | -1.8407  | -1.227820068 | -0.8564653 |
| Olf1181   | 258060 | -3.7346   | -4.3202  | -2.8755  | -3.5646  | -2.62356975  | -0.4605241 |
| Olf1269   | 258339 | 1.8107    | 1.6195   | 2.4376   | 2.8046   | -0.027769733 | -0.4648551 |
| Olf1133   | 258828 | -3.2808   | -4.0204  | -2.3656  | -2.3903  | -2.066175591 | -0.2652256 |
| Olf11361  | 258534 | -4.5246   | -4.1346  | -2.2027  | -1.9157  | -4.728777088 | -4.1469093 |
| Olf1525   | 258958 | 1.6822    | 2.063    | 2.8517   | 2.692    | 1.749907346  | 0.01944027 |
| Olf1575   | 259118 | 3.0013    | 3.0973   | 2.3529   | 2.7408   | 1.282317353  | 1.4975641  |
| Olf1808   | 258930 | 0.60977   | 0.77736  | 2.5374   | 0.73421  | 0.50625511   | -0.665683  |
| Olf1809   | 258321 | 0.96139   | 0.94398  | 2.4242   | 2.1522   | 0.68486539   | -0.9223    |
| Olf1860   | 258521 | -0.064173 | 0.47345  | 6.1901   | 0.094614 | -1.968067918 | -0.4393268 |
| Ormdl2    | 66844  | 2.4619    | 2.5897   | 2.2191   | 2.963    | 2.17914369   | 1.81991692 |
| Ott       | 18422  | 2.278     | 2.1297   | 2.5855   | 2.6809   | 1.357666761  | 0.71204535 |
| Pcdhqa2   | 93710  | 1.8682    | 2.256    | 2.542    | 3.1085   | 1.78295164   | 0.6758968  |
| Pcdhgb4   | 93701  | 1.1578    | 0.7995   | 3.5124   | 3.1837   | 3.28086909   | 2.93688278 |
| Pcsk4     | 18551  | 1.5064    | 1.3853   | 2.1186   | 2.4094   | 1.550059641  | 1.66721698 |
| Pcyt1a    | 13026  | -3.1331   | -3.4355  | -2.7416  | -3.266   | -2.292760183 | -0.9333466 |
| Pde6b     | 18587  | 1.1558    | 1.377    | 2.032    | 2.4262   | 0.887944877  | -0.0454306 |
| Pdlim3    | 53318  | -3.267    | -3.2916  | -1.0262  | -0.95565 | -0.064120493 | -1.534842  |
| Pes1      | 64934  | -4.8624   | -4.7872  | -1.7871  | -2.5716  | -5.198125551 | -4.1857454 |
| Pex12     | 103737 | -3.0572   | -3.747   | -1.6931  | -1.8074  | -2.873455763 | -2.4678154 |
| Pglyrp4   | 384997 | 1.1996    | 1.3462   | 2.1884   | 2.0871   | 0.789049628  | 0.22264067 |
| Phf5a     | 68479  | 2.3154    | 1.5096   | 2.4515   | 2.7979   | 0.006415189  | 1.26730326 |
| Phyh      | 16922  | -3.4283   | -3.2491  | -3.6669  | -3.5704  | -1.914139251 | -2.011359  |
| Pik3cb    | 74769  | -2.5987   | -4.1801  | -1.7141  | -2.5355  | -1.710638817 | -1.2909398 |
| Pip       | 18716  | -3.9578   | -3.2747  | -2.2761  | -2.5049  | -3.181473118 | -1.3962345 |
| Pkp2      | 67451  | 1.7906    | 1.862    | 2.2867   | 2.2661   | 0.636531236  | -0.3774338 |
| Plac8     | 231507 | -3.6444   | -4.0372  | -2.054   | -2.3369  | -2.354870148 | -1.4960245 |
| Plaur     | 18793  | 1.9081    | 2.1122   | 3.6335   | 3.4412   | 1.395640201  | 1.41457258 |
| Plg       | 18815  | 0.4848    | -4.57    | -0.33269 | -0.43048 | -0.111300439 | 0.18660951 |
| Pofut1    | 140484 | 1.9411    | 2.3082   | 2.7453   | 3.3244   | 1.118983354  | 1.45355691 |
| Ppargc1b  | 170826 | -4.8757   | -5.4442  | -5.0552  | -4.4096  | -1.297126859 | -0.3241964 |
| Ppp3r2    | 19059  | -3.5103   | -3.7085  | -2.6057  | -2.9751  | 0.191258192  | -1.7208794 |
| Prcc      | 94315  | 1.4276    | 1.8078   | 2.1868   | 3.1174   | 0.555532999  | -0.5742398 |
| Prkwnk4   | 69847  | 0.69653   | 0.224    | 2.0477   | 2.4485   | -1.274219226 | -1.1118899 |



|          |        |           |           |          |          |              |            |
|----------|--------|-----------|-----------|----------|----------|--------------|------------|
| Prpf8    | 192159 | -3.0517   | -3.7249   | -1.6648  | -1.3206  | -0.794605102 | -0.8785029 |
| Psemb2   | 26445  | 1.3751    | 1.9084    | 2.2341   | 2.2269   | 0.995001056  | 2.03891493 |
| Psemb5   | 19173  | 1.5246    | 1.7391    | 2.966    | 2.2966   | 2.687952485  | 1.57211004 |
| Psemb6   | 19175  | 1.1802    | 1.9424    | 2.5382   | 2.5474   | 1.850662908  | 0.73295231 |
| Psemb9   | 16912  | -3.7046   | -2.6763   | -1.841   | -2.3989  | -1.706918194 | -2.1881044 |
| Psmid14  | 59029  | 1.8594    | 2.1207    | 2.9153   | 3.6471   | 0.553489372  | 2.97414957 |
| Psmid2   | 21762  | -0.21305  | -0.16682  | 4.1679   | 4.2935   | 0.129216122  | -0.5870162 |
| Ptprn2   | 19276  | -4.9234   | -4.3594   | -3.8057  | -2.7681  | -2.322599852 | -0.7814313 |
| Qtrt1    | 60507  | 1.2126    | 1.5865    | 3.2161   | 3.0147   | 0.58709719   | 0.41701245 |
| Rab18    | 19330  | -3.3166   | -4.5921   | -3.3774  | -3.6364  | -3.008396247 | -2.5684642 |
| Rad21    | 19357  | 1.5912    | 0.82627   | 2.2296   | 2.4865   | 1.904476154  | 0.33052408 |
| Ran      | 19384  | 0.027267  | 0.52175   | 2.8128   | 1.6313   | 5.515089715  | 1.453248   |
| Ranbp1   | 19385  | -0.3905   | -0.18495  | 3.8501   | -0.26907 | 0.14014715   | 0.62366028 |
| Rara     | 19401  | -3.9301   | -3.5015   | -2.1078  | -2.1464  | -2.983153041 | -1.3273169 |
| Rasgrp4  | 233046 | -3.6339   | -3.16     | -1.0599  | -1.808   | -2.765421902 | -1.2867324 |
| Rasl12   | 70784  | -4.3513   | -0.24929  | 1.0889   | 0.4314   | 0.66706343   | -0.9785215 |
| Rbed1    | 232089 | -4.4339   | -3.8407   | -3.2492  | -2.3689  | -3.128107975 | -1.1930156 |
| Rbm8     | 60365  | 2.5786    | 1.4697    | 2.9667   | 2.9797   | 1.396767251  | 2.01569115 |
| Resp18   | 19711  | -3.6429   | -2.9531   | -2.18    | -1.7573  | -1.789776743 | -1.2833468 |
| Rheb     | 19744  | -5.4918   | 1.0072    | 0.37925  | 0.41899  | 0.037687434  | -0.6881654 |
| Rnf150   | 330812 | -3.9984   | -4.415    | -2.9003  | -2.6654  | -3.587822198 | -0.9133231 |
| Rnf2     | 19821  | -6.2025   | -4.2946   | -2.3225  | -2.3544  | -2.47854692  | -3.7208743 |
| Rpn1     | 103963 | -4.2997   | -3.2      | -1.7694  | -1.8072  | -1.628737581 | -0.4210765 |
| Rps16    | 20055  | 0.20822   | -0.44299  | 0.90988  | 1.8748   | -0.131125657 | 0.93368144 |
| Rragc    | 54170  | -4.9669   | -4.4249   | -3.6881  | -3.4307  | -0.111741754 | -1.7459814 |
| Rrm1     | 20133  | -0.020454 | 2.4533    | 5.4226   | 1.914    | 0.037205383  | 2.3964216  |
| Rsl1     | 380855 | 1.3692    | 1.5308    | 2.5307   | 2.1977   | 0.446351719  | 1.63601098 |
| S100a8   | 20201  | -6.1628   | -0.022413 | -0.45882 | -0.30108 | -0.279427795 | -0.4828953 |
| Sbp      | 20234  | -3.2483   | -3.2025   | -2.3424  | -3.1865  | -1.8577528   | -1.1461973 |
| Scgb1a1  | 22287  | -4.8181   | -3.3217   | -3.3412  | -2.4128  | -2.91823903  | -1.6021657 |
| Scgb3a1  | 68662  | 0.79269   | 0.90988   | 2.1678   | 2.036    | 1.144722191  | 0.10477332 |
| Scrib    | 105782 | -4.6754   | -3.8166   | -2.2237  | -2.226   | -2.104970556 | -1.1917367 |
| Sdk1     | 330222 | -3.3371   | -3.1001   | -1.7914  | -1.9665  | 0.232938676  | -1.907961  |
| Sec61g   | 20335  | -3.6828   | -3.7025   | -2.0262  | -1.2713  | -2.621675491 | -2.2555208 |
| Seh1l    | 72124  | 1.3115    | 1.3647    | 2.4353   | 2.7349   | 0.345657263  | 0.33137049 |
| Sertad1  | 55942  | 1.1021    | 0.54988   | 2.3327   | 2.2538   | 1.003107669  | -0.2788424 |
| Set7     | 73251  | -3.2404   | -3.1676   | -2.5434  | -3.0679  | -2.538042943 | -0.8084237 |
| Sf3a1    | 67465  | 0.60254   | 1.0565    | 2.1207   | 2.1222   | -1.496872722 | -0.7903649 |
| Sf3a3    | 75062  | 0.78954   | 1.0691    | 2.6001   | 3.4574   | 0.350973409  | 0.47681725 |
| Sf3b1    | 81898  | -0.82982  | -0.98753  | 2.8362   | 2.7068   | 1.090148525  | 0.55619453 |
| Sf3b2    | 319322 | 0.9341    | 0.44153   | 2.0357   | 2.6308   | 0.286704397  | 0.12217725 |
| Sf3b3    | 101943 | 1.2735    | 1.94      | 2.562    | 2.5407   | 1.012769068  | 0.49712493 |
| Sh2bp1   | 22083  | 1.6843    | 1.4877    | 2.3161   | 2.1227   | -0.476790558 | -1.3367077 |
| Siat8b   | 20450  | -3.5041   | -2.6184   | -2.4303  | -3.3061  | 0.308104769  | -0.3414397 |
| Slamf9   | 98365  | -3.1964   | -3.2938   | -1.949   | -1.6205  | -1.434701652 | -0.9456535 |
| Slc12a1  | 20495  | -4.1215   | -4.1832   | -2.2062  | -1.8378  | -2.815473789 | -2.2563363 |
| Slc24a5  | 317750 | 1.9599    | 1.6455    | 2.7213   | 2.3713   | 0.423430508  | -0.0073483 |
| Slc2a10  | 170441 | 1.9828    | 1.9329    | 2.099    | 2.154    | 0.985794551  | 0.2546004  |
| Slc31a2  | 20530  | -3.3796   | -3.7355   | -2.5824  | -2.1179  | -1.653899314 | -0.4898952 |
| Slc35f2  | 72022  | -3.099    | -3.409    | -1.654   | -2.509   | -2.140751001 | -1.3220036 |
| Slc7a5   | 20539  | 0.075711  | 0.93623   | 2.1528   | 2.4784   | 2.033720283  | 0.94824959 |
| Smc5l1   | 226026 | 1.5422    | 1.6135    | 2.3104   | 2.657    | -0.482480125 | -0.6436949 |
| Snrnp116 | 20624  | -3.4579   | -3.8712   | -2.8169  | -1.6778  | -1.463081588 | -0.1371828 |
| Snrpa1   | 68981  | 1.0604    | 0.74998   | 2.7363   | 3.3875   | -0.020871644 | 0.37398759 |
| Snrpd2   | 107686 | -1.5675   | -0.69583  | 2.4108   | 3.4429   | 2.008898023  | 0.18112329 |
| Snrpe    | 20643  | -0.64843  | -1.2852   | 2.6303   | 3.5164   | 0.140873622  | 0.87771947 |
| Spat4    | 69281  | 1.4491    | 1.3204    | 2.0013   | 2.0512   | 0.652289569  | -0.2866145 |
| Sprr2d   | 20758  | 1.1371    | 0.33248   | 2.9382   | 2.7454   | 1.087059321  | 0.20485368 |
| Sprri5   | 68720  | -5.9185   | -2.4117   | -3.7818  | -4.2915  | -0.654782997 | -0.6350578 |
| Ssrp1    | 20833  | 2.6391    | 1.4896    | 2.998    | 3.7887   | 0.883789729  | -0.2768962 |
| Sstk     | 83984  | -3.9491   | -3.5272   | -5.3094  | -3.255   | -1.826765712 | -0.5410691 |
| Supt16h  | 114741 | 1.1934    | 0.39815   | 3.0022   | 2.5059   | 0.275427107  | -0.7473092 |
| Surb7    | 108098 | 0.36339   | 0.12385   | 3.9012   | 0.7386   | 1.68406318   | -0.1050192 |
| Tada3l   | 101206 | 1.3702    | 1.1058    | 3.1103   | 2.5284   | 0.685849861  | 1.24691526 |
| Tcp10a   | 21460  | -3.8989   | -3.3437   | -2.3719  | -2.0098  | -3.658534406 | -2.8754519 |
| Tdrd6    | 210510 | -3.9543   | -4.2451   | -3.9744  | -2.9522  | -2.482654542 | -0.1964069 |
| TGFβr1   | 21812  | -6.5442   | -5.8763   | -3.4675  | -4.0597  | -4.380124824 | -3.3026299 |
| TGFβr2   | 21813  | -3.8618   | -3.0052   | -2.0338  | -1.7408  | -0.064684018 | 0.26173003 |
| Timd2    | 171284 | 1.4287    | 1.2057    | 2.1042   | 2.0733   | 1.719612784  | 0.88096302 |
| Tle4     | 21888  | 1.5555    | 1.2399    | 2.0667   | 2.0703   | 0.503478222  | -0.0316533 |
| Treh     | 58866  | -4.8226   | -4.9743   | -4.4767  | -3.272   | -3.475952293 | -2.1986382 |
| Trem3    | 58218  | -4.3154   | -1.6425   | -3.8048  | -3.1871  | -1.981728308 | -0.8686116 |
| Trip6    | 22051  | 0.96094   | 1.0947    | 2.8715   | 1.9783   | -0.275924434 | 0.26009899 |
| Trpv1    | 193034 | 1.1402    | 1.4814    | 2.0435   | 3.0483   | 1.19461113   | 0.11601143 |
| Ube2m    | 22192  | 1.3332    | 1.4471    | 3.5574   | 1.8902   | -0.708847454 | -0.7231834 |
| V1rc15   | 171188 | -3.6239   | -3.5336   | -2.7207  | -1.7368  | -2.64964127  | -1.857201  |
| V1rh3    | 171246 | 0.71908   | 0.60122   | 2.0887   | 2.3914   | 0.612815658  | -0.2252899 |
| V1ri7    | 171258 | -3.8336   | -3.3767   | -2.6146  | -2.9549  | -2.014630023 | -0.9067124 |
| V2r4     | 22310  | 1.0285    | 1.142     | 2.5855   | 2.629    | -0.128090769 | -0.877156  |
| Vcl      | 22330  | -1.5929   | -0.73445  | 6.1486   | -1.6715  | 0.704072767  | -0.6198286 |
| Vps28    | 66914  | 1.332     | 1.5623    | 3.4496   | 3.3182   | 2.588833184  | 0.4176488  |

|        |        |           |          |         |         |              |            |
|--------|--------|-----------|----------|---------|---------|--------------|------------|
| Wbp5   | 22381  | -3.0482   | -3.531   | -2.2663 | -3.2408 | 0.554786158  | 0.30471164 |
| Whsc2  | 24116  | -4.1696   | -2.231   | -3.2038 | -2.768  | -1.914451566 | -1.1204034 |
| Xlr4   | 27083  | -3.0013   | -3.1439  | -1.6345 | -1.7496 | -1.961359933 | -0.8061811 |
| Xpo1   | 103573 | -0.28535  | 0.2653   | 3.3469  | 1.906   | 0.983255293  | 2.03654251 |
| Ythdf3 | 229096 | 1.126     | 1.2413   | 2.5651  | 1.3649  | 1.359391283  | 0.34027325 |
| Zcchc9 | 69085  | 1.9333    | 1.4463   | 3.3276  | 2.5059  | 1.629822197  | 2.26301612 |
| Zf     | 233490 | -0.036777 | 0.037508 | 2.576   | 1.6824  | 0.5058749    | -0.3713915 |
| Zfp265 | 53861  | 0.4178    | 0.94988  | 2.6213  | 1.8523  | 0.642444854  | 0.03937726 |
| Zfp451 | 98403  | 1.3621    | 1.0896   | 2.4968  | 2.3594  | 0.112161003  | -1.1453138 |
| Zppp   | 53604  | -3.0864   | -4.1214  | -2.0254 | -1.5383 | -1.721617371 | -2.0732582 |

**SUPPLEMENTAL MATERIALS AND METHODS**

*Primers.* List of primers used for quantification of gene expression.

|                      | <b>FORWARD</b>           | <b>REVERSE</b>           |
|----------------------|--------------------------|--------------------------|
| <b>Mouse genes</b>   |                          |                          |
| <i>Atp5o</i>         | TCTCGACAGGTTCCGGAGCTT    | AGAGTACAGGGCGGTTGCATA    |
| <i>Coco</i>          | ATGACCCTGTTCTGGGGACA     | TTATGGTTCCCACGGAATGC     |
| <i>Ctgf</i>          | GGGCCTCTTCTGCGATTTT      | ATCCAGGCAAGTGCATTGGTA    |
| <i>Pai1</i>          | GTAGCACAGGCACTGCAAAA     | GCCGAACCACAAAGAGAAA      |
|                      |                          |                          |
| <b>Human genes</b>   |                          |                          |
| <i>ATP5O</i>         | ACTCGGGTTTGACCTACAGC     | GGTACTGAAGCATCGCACCT     |
| <i>ID1</i>           | ATCGCATCTTGTGTCGCTGA     | GTGGAATCCCACCCCCTAAA     |
| <i>ID2</i>           | GCAAAGCACTGTGTGGCTGA     | CCAACTGCAGAAAGGGCATT     |
| <i>ID3</i>           | CACCTTCCCATCCAGACAGC     | TCCAGGAAGGGATTTGGTGA     |
| <i>LEFTY1</i>        | ACCTCAGGGACTATGGAGCTCAGG | AGAAATGGCCAATTGAAGGCCAGG |
| <i>LEFTY2</i>        | TGCTACAGGTGTCGGTGCAGAGG  | AGAAACGGCCACTTGAAGGCCAGG |
| <i>PAI1</i>          | GAGAAACCCAGCAGCAGATT     | TGGTGCTGATCTCATCCTTG     |
|                      |                          |                          |
| <b>Xenopus genes</b> |                          |                          |
| <i>gsc</i>           | TTCACCGATGAACAACCTGGA    | TTCCAATTTTGGGCATTTTC     |
| <i>vent2.2</i>       | TGACACTTGGGCACTGTTCTG    | CCTCTGTTGAATGGCTTGCT     |
